# Supplementary material for: How Do Polish Students Manage Emotional Distress during the COVID-19 Lockdown? A Web-Based Cross-Sectional Study
Source: MDPI journal article supplement (doi:10.3390/jcm10214964), 2021-10-26
Supplement: s1 [file s1]

# Supplementary Material

**Table S1.** The results of the DASS total score for the field of study.

|                  |                        | Field of study |        |       |                           |                                          |                                             |                       |
|------------------|------------------------|----------------|--------|-------|---------------------------|------------------------------------------|---------------------------------------------|-----------------------|
|                  | Group                  | Mean           | Median | SD    | Kruskal– Wallis<br>H test | Bonferroni correction<br><i>p</i> -value | Multiple comparisons*<br>( <i>p</i> -value) |                       |
|                  |                        |                |        |       |                           |                                          |                                             |                       |
| DASS total score | I. Arts and humanities | 43.51          | 39.00  | 28.98 | 16.16                     | 0.01                                     | 0.0028                                      | II vs. III<br>(0.009) |
|                  | II. Sciences           | 46.08          | 42.00  | 27.91 |                           |                                          |                                             |                       |
|                  | III. Medicine          | 36.56          | 31.00  | 25.49 |                           |                                          |                                             |                       |
|                  | IV. Engineering        | 38.24          | 32.00  | 26.79 |                           |                                          |                                             |                       |
|                  | V. Social sciences     | 39.65          | 35.00  | 28.14 |                           |                                          |                                             |                       |

\*only significant.

**Table S2.** The results of the DASS depression scale for the field of study.

|                       |                        | Field of study |        |       |                           |                                          |                                             |                       |
|-----------------------|------------------------|----------------|--------|-------|---------------------------|------------------------------------------|---------------------------------------------|-----------------------|
|                       | Group                  | Mean           | Median | SD    | Kruskal– Wallis<br>H test | Bonferroni correction<br><i>p</i> -value | Multiple comparisons*<br>( <i>p</i> -value) |                       |
|                       |                        |                |        |       |                           |                                          |                                             |                       |
| DASS Depression Scale | I. Arts and humanities | 15.42          | 13.00  | 10.92 | 19.82                     | 0.01                                     | 0.0005                                      | II vs. III<br>(0.012) |
|                       | II. Sciences           | 16.65          | 16.00  | 11.44 |                           |                                          |                                             |                       |
|                       | III. Medicine          | 12.73          | 10.00  | 10.01 |                           |                                          |                                             |                       |
|                       | IV. Engineering        | 14.74          | 12.00  | 11.15 |                           |                                          |                                             |                       |
|                       | V. Social sciences     | 13.93          | 12.00  | 10.80 |                           |                                          |                                             |                       |

\*only significant.

**Table S3.** The results of the DASS anxiety scale for the field of study.

|                    |                        | Field of study |        |      |                           |                                          |                       |   |
|--------------------|------------------------|----------------|--------|------|---------------------------|------------------------------------------|-----------------------|---|
|                    | Group                  | Mean           | Median | SD   | Kruskal– Wallis<br>H test | Bonferroni correction<br><i>p</i> -value | Multiple comparisons* |   |
|                    |                        |                |        |      |                           |                                          |                       |   |
| DASS Anxiety Scale | I. Arts and humanities | 9.02           | 6.00   | 9.63 | 14.00                     | -                                        | 0.0073                | - |
|                    | II. Sciences           | 9.67           | 6.00   | 9.21 |                           |                                          |                       |   |
|                    | III. Medicine          | 7.26           | 4.00   | 8.00 |                           |                                          |                       |   |
|                    | IV. Engineering        | 7.24           | 4.00   | 8.07 |                           |                                          |                       |   |
|                    | V. Social sciences     | 8.52           | 6.00   | 8.64 |                           |                                          |                       |   |

\*only significant.

**Table S4.** The results of the DASS stress scale for the field of study.

|                   |                        | Field of study |        |       |                           |                          |         |                       |
|-------------------|------------------------|----------------|--------|-------|---------------------------|--------------------------|---------|-----------------------|
| DASS Stress Scale | Group                  | Mean           | Median | SD    | Kruskal- Wallis<br>H test | Bonferroni<br>correction | p-value | Multiple comparisons* |
|                   | I. Arts and humanities | 19.07          | 19.00  | 11.63 | 11.75                     | -                        | 0.0193  | -                     |
|                   | II. Sciences           | 19.77          | 20.00  | 11.12 |                           |                          |         |                       |
|                   | III. Medicine          | 16.56          | 16.00  | 10.73 |                           |                          |         |                       |
|                   | IV. Engineering        | 16.26          | 26.00  | 10.82 |                           |                          |         |                       |
|                   | V. Social sciences     | 17.19          | 16.00  | 11.51 |                           |                          |         |                       |

\*only significant.

**Table S5.** The results of the most frequently chosen stress coping strategies for having other chronic disease.

| Do you have any chronic disease? |       |      |        |      |
|----------------------------------|-------|------|--------|------|
| Stress coping strategy           | Other |      |        |      |
|                                  | N     | Mean | Median | SD   |
| Acceptance                       | 105   | 2.20 | 2.50   | 0.67 |
| Emotional support                |       | 1.65 | 1.50   | 0.91 |
| Self-distraction                 |       | 1.54 | 1.50   | 0.73 |
| Planning                         |       | 1.53 | 1.50   | 0.78 |
| Venting                          |       | 1.48 | 1.50   | 0.76 |
| Denial                           |       | 0.44 | 0.00   | 0.66 |
| Use of informational support     |       | 1.44 | 1.50   | 0.84 |
| Positive reframing               |       | 1.37 | 1.50   | 0.91 |
| Active coping                    |       | 1.05 | 1.00   | 0.75 |
| Humor                            |       | 1.04 | 1.00   | 0.65 |
| Religion                         |       | 0.86 | 0.50   | 0.98 |
| Self-blame                       |       | 0.82 | 1.00   | 0.69 |
| Behavioral disengagement         |       | 0.73 | 0.50   | 0.72 |
| Substance use                    |       | 0.33 | 0.00   | 0.67 |

**Table S6.** The results of the most frequently chosen stress coping strategies without having a chronic disease.

| Do you have any chronic disease? |      |      |        |      |
|----------------------------------|------|------|--------|------|
| Stress coping strategy           | No   |      |        |      |
|                                  | N    | Mean | Median | SD   |
| Acceptance                       | 1837 | 2.20 | 2.50   | 0.71 |
| Emotional support                |      | 1.57 | 1.50   | 0.92 |
| Planning                         |      | 1.42 | 1.50   | 0.85 |
| Positive reframing               |      | 1.42 | 1.50   | 0.90 |
| Self-distraction                 |      | 1.41 | 1.50   | 0.81 |
| Venting                          |      | 1.23 | 1.50   | 0.77 |
| Use of informational support     |      | 1.15 | 1.00   | 0.86 |
| Humor                            |      | 1.09 | 1.00   | 0.71 |
| Active coping                    |      | 0.99 | 1.00   | 0.80 |
| Religion                         |      | 0.79 | 0.50   | 0.97 |
| Self-blame                       |      | 0.73 | 0.50   | 0.69 |
| Behavioral disengagement         |      | 0.69 | 0.50   | 0.75 |
| Substance use                    |      | 0.49 | 0.00   | 0.79 |
| Denial                           |      | 0.42 | 0.00   | 0.64 |

**Table S7.** The results of the most frequently chosen stress coping strategies for thyroid diseases.

| Do you have any chronic disease? |                  |      |        |      |
|----------------------------------|------------------|------|--------|------|
| Stress coping strategy           | Thyroid diseases |      |        |      |
|                                  | N                | Mean | Median | SD   |
| Acceptance                       | 88               | 2.04 | 2.00   | 0.77 |
| Emotional support                |                  | 1.76 | 2.00   | 0.93 |
| Planning                         |                  | 1.51 | 1.50   | 0.80 |
| Self-distraction                 |                  | 1.47 | 1.50   | 0.75 |
| Positive reframing               |                  | 1.37 | 1.25   | 0.77 |
| Use of informational support     |                  | 1.36 | 1.50   | 0.85 |
| Venting                          |                  | 1.36 | 1.50   | 0.70 |
| Active coping                    |                  | 1.00 | 1.00   | 0.72 |
| Humor                            |                  | 0.97 | 1.00   | 0.61 |
| Self-blame                       |                  | 0.77 | 0.50   | 0.76 |
| Behavioral disengagement         |                  | 0.66 | 0.50   | 0.74 |
| Religion                         |                  | 0.60 | 0.00   | 0.88 |
| Substance use                    |                  | 0.52 | 0.00   | 0.86 |
| Denial                           |                  | 0.39 | 0.00   | 0.55 |

**Table S8.** The results of the most frequently chosen stress coping strategies for asthma.

| Do you have any chronic disease? |        |      |        |      |
|----------------------------------|--------|------|--------|------|
| Stress coping strategy           | Asthma |      |        |      |
|                                  | N      | Mean | Median | SD   |
| Acceptance                       | 54     | 2.23 | 2.50   | 0.75 |
| Planning                         |        | 1.54 | 1.50   | 0.82 |
| Positive reframing               |        | 1.48 | 1.50   | 0.92 |
| Emotional support                |        | 1.44 | 1.50   | 1.00 |
| Self-distraction                 |        | 1.36 | 1.50   | 0.78 |
| Venting                          |        | 1.19 | 1.50   | 0.74 |
| Use of informational support     |        | 1.15 | 1.00   | 0.84 |
| Humor                            |        | 1.08 | 1.00   | 0.76 |
| Religion                         |        | 1.04 | 1.00   | 1.07 |
| Active coping                    |        | 0.93 | 1.00   | 0.71 |
| Behavioral disengagement         |        | 0.87 | 0.75   | 0.77 |
| Self-blame                       |        | 0.82 | 1.00   | 0.73 |
| Substance use                    |        | 0.62 | 0.00   | 0.84 |
| Denial                           |        | 0.47 | 0.00   | 0.75 |

**Table S9.** The results of the most frequently chosen stress coping strategies for allergy.

| Do you have any chronic disease? |         |      |        |      |
|----------------------------------|---------|------|--------|------|
| Stress coping strategy           | Allergy |      |        |      |
|                                  | N       | Mean | Median | SD   |
| Acceptance                       | 32      | 2.00 | 2.00   | 0.80 |
| Emotional support                |         | 1.48 | 1.50   | 0.96 |
| Self-distraction                 |         | 1.48 | 1.50   | 0.81 |
| Planning                         |         | 1.39 | 1.50   | 0.83 |
| Venting                          |         | 1.39 | 1.50   | 0.77 |
| Positive reframing               |         | 1.23 | 1.50   | 0.80 |
| Use of informational support     |         | 1.22 | 1.25   | 0.88 |
| Humor                            |         | 1.13 | 1.00   | 0.61 |
| Active coping                    |         | 1.09 | 1.00   | 0.87 |
| Self-blame                       |         | 0.98 | 1.00   | 0.79 |
| Religion                         |         | 0.78 | 0.25   | 0.97 |
| Behavioral disengagement         |         | 0.55 | 0.00   | 0.72 |
| Substance use                    |         | 0.44 | 0.00   | 0.74 |
| Denial                           |         | 0.34 | 0.20   | 0.45 |

**Table S10.** The results of the most frequently chosen stress coping strategies for diabetes.

| Do you have any chronic disease? |          |      |        |      |
|----------------------------------|----------|------|--------|------|
| Stress coping strategy           | Diabetes |      |        |      |
|                                  | N        | Mean | Median | SD   |
| Acceptance                       | 15       | 2.37 | 2.50   | 0.64 |
| Emotional support                |          | 1.70 | 2.00   | 1.03 |
| Venting                          |          | 1.63 | 1.50   | 0.74 |
| Use of informational support     |          | 1.60 | 1.50   | 0.85 |
| Positive reframing               |          | 1.57 | 2.00   | 1.10 |
| Planning                         |          | 1.50 | 1.50   | 0.96 |
| Self-distraction                 |          | 1.43 | 1.50   | 0.82 |
| Humor                            |          | 1.07 | 1.00   | 0.62 |
| Active coping                    |          | 1.03 | 1.00   | 0.92 |
| Self-blame                       |          | 0.90 | 1.00   | 0.74 |
| Behavioral disengagement         |          | 0.80 | 1.00   | 0.84 |
| Religion                         |          | 0.73 | 0.00   | 0.86 |
| Denial                           |          | 0.53 | 0.00   | 0.85 |
| Substance use                    |          | 0.27 | 0.00   | 0.56 |

**Table S11.** The results of the most frequently chosen stress coping strategies for mental disorders.

| Do you have any chronic disease? |                  |      |        |      |
|----------------------------------|------------------|------|--------|------|
| Stress coping strategy           | Mental disorders |      |        |      |
|                                  | N                | Mean | Median | SD   |
| Acceptance                       | 41               | 2.22 | 2.50   | 0.58 |
| Self-distraction                 |                  | 1.78 | 2.00   | 0.76 |
| Venting                          |                  | 1.67 | 1.50   | 0.85 |
| Emotional support                |                  | 1.51 | 1.50   | 1.00 |
| Planning                         |                  | 1.48 | 1.50   | 0.89 |
| Use of informational support     |                  | 1.44 | 1.50   | 0.88 |
| Humor                            |                  | 1.30 | 1.50   | 0.68 |
| Active coping                    |                  | 1.22 | 1.00   | 0.96 |
| Positive reframing               |                  | 1.18 | 1.00   | 0.85 |
| Self-blame                       |                  | 1.16 | 1.00   | 0.82 |
| Behavioral disengagement         |                  | 1.12 | 1.00   | 0.89 |
| Substance use                    |                  | 1.05 | 1.00   | 1.10 |
| Denial                           |                  | 0.67 | 0.50   | 0.81 |
| Religion                         |                  | 0.60 | 0.00   | 0.87 |

**Table S12.** The results of the DASS total score for females and males.

|                         | Females |       | Males |       | <i>p</i>  |
|-------------------------|---------|-------|-------|-------|-----------|
|                         | Mean    | SD    | Mean  | SD    |           |
| <b>DASS Total score</b> | 40.54   | 26.65 | 31.60 | 25.02 | 0.0000001 |

**Table S13.** The results of the most frequently chosen type of coping strategies by all respondents.

|                        | N    | Mean  | Median | Minimum | Maximum | SD   | SE   |
|------------------------|------|-------|--------|---------|---------|------|------|
| <b>Avoidant coping</b> | 2172 | 22.82 | 22.00  | 12.00   | 45.00   | 5.78 | 0.12 |
| <b>Approach coping</b> | 2172 | 29.60 | 29.00  | 12.00   | 48.00   | 6.89 | 0.15 |

**Table S14.** The results of the most frequently chosen stress coping strategies by all respondents.

| Stress coping strategy       | Statement                                                                                                                            | N    | Mean | Median | SD   |
|------------------------------|--------------------------------------------------------------------------------------------------------------------------------------|------|------|--------|------|
| Acceptance                   | I've been accepting the reality of the fact that it has happened.                                                                    | 2172 | 2.19 | 2.50   | 0.71 |
|                              | I've been learning to live with it.                                                                                                  |      |      |        |      |
| Emotional support            | I've been getting emotional support from others.                                                                                     | 158  | 1.58 | 1.50   | 0.93 |
|                              | I've been getting comfort and understanding from someone.                                                                            |      |      |        |      |
| Planning                     | I've been trying to come up with a strategy about what to do.                                                                        | 144  | 1.44 | 1.50   | 0.84 |
|                              | I've been thinking hard about what steps to take.                                                                                    |      |      |        |      |
| Self-distraction             | I've been turning to work or other activities to take my mind off things.                                                            | 143  | 1.43 | 1.50   | 0.80 |
|                              | I've been doing something to think about it less, such as going to movies, watching TV, reading, daydreaming, sleeping, or shopping. |      |      |        |      |
| Positive reframing           | I've been trying to see it in a different light, to make it seem more positive.                                                      | 141  | 1.41 | 1.50   | 0.90 |
|                              | I've been looking for something good in what is happening.                                                                           |      |      |        |      |
| Venting                      | I've been saying things to let my unpleasant feelings escape.                                                                        | 128  | 1.28 | 1.50   | 0.77 |
|                              | I've been expressing my negative feelings.                                                                                           |      |      |        |      |
| Use of informational support | I've been getting help and advice from other people.                                                                                 | 118  | 1.18 | 1.00   | 0.87 |
|                              | I've been trying to get advice or help from other people about what to do.                                                           |      |      |        |      |
| Humor                        | I've been making jokes about it.                                                                                                     | 109  | 1.09 | 1.00   | 0.71 |
|                              | I've been making fun of the situation.                                                                                               |      |      |        |      |
| Active coping                | I've been concentrating my efforts on doing something about the situation I'm in.                                                    | 100  | 1.00 | 1.00   | 0.80 |
|                              | I've been taking action to try to make the situation better.                                                                         |      |      |        |      |
| Religion                     | I've been trying to find comfort in my religion or spiritual beliefs.                                                                | 79   | 0.79 | 0.50   | 0.97 |
|                              | I've been praying or meditating.                                                                                                     |      |      |        |      |
| Self-blame                   | I've been criticizing myself.                                                                                                        | 75   | 0.75 | 0.50   | 0.70 |
|                              | I've been blaming myself for things that happened.                                                                                   |      |      |        |      |
| Behavioral disengagement     | I've been giving up trying to deal with it.                                                                                          | 70   | 0.70 | 0.50   | 0.76 |
|                              | I've been giving up the attempt to cope.                                                                                             |      |      |        |      |
| Substance use                | I've been using alcohol or other drugs to make myself feel better.                                                                   | 50   | 0.50 | 0.00   | 0.80 |
|                              | I've been using alcohol or other drugs to help me get through it.                                                                    |      |      |        |      |
| Denial                       | I've been saying to myself "this isn't real".                                                                                        | 43   | 0.43 | 0.00   | 0.64 |
|                              | I've been refusing to believe that it has happened.                                                                                  |      |      |        |      |

**Table S15.** The results of the most frequently chosen stress coping strategies by medical students.

| Stress coping strategy       | Medicine |        |      |
|------------------------------|----------|--------|------|
|                              | Mean     | Median | SD   |
| Acceptance                   | 2.26     | 2.50   | 0.68 |
| Emotional support            | 1.62     | 1.50   | 0.91 |
| Planning                     | 1.50     | 1.50   | 0.83 |
| Positive reframing           | 1.45     | 1.50   | 0.89 |
| Self-distraction             | 1.44     | 1.50   | 0.80 |
| Venting                      | 1.30     | 1.50   | 0.74 |
| Use of informational support | 1.24     | 1.00   | 0.85 |
| Humor                        | 1.13     | 1.00   | 0.73 |
| Active coping                | 1.05     | 1.00   | 0.81 |
| Religion                     | 0.86     | 0.50   | 0.99 |
| Self-blame                   | 0.77     | 0.50   | 0.69 |
| Behavioral disengagement     | 0.67     | 0.50   | 0.73 |
| Substance use                | 0.46     | 0.00   | 0.74 |
| Denial                       | 0.40     | 0.00   | 0.62 |



**Table S16.** The results of the most frequently chosen stress coping strategies by engineering students.

| Stress coping strategy       | Engineering |        |      |
|------------------------------|-------------|--------|------|
|                              | Mean        | Median | SD   |
| Acceptance                   | 2.18        | 2.50   | 0.73 |
| Planning                     | 1.39        | 1.50   | 0.87 |
| Emotional support            | 1.39        | 1.50   | 0.94 |
| Self-distraction             | 1.33        | 1.50   | 0.78 |
| Positive reframing           | 1.28        | 1.00   | 0.90 |
| Humor                        | 1.13        | 1.00   | 0.71 |
| Venting                      | 1.10        | 1.00   | 0.78 |
| Use of informational support | 0.99        | 1.00   | 0.77 |
| Active coping                | 0.93        | 1.00   | 0.77 |
| Self-blame                   | 0.75        | 0.50   | 0.75 |
| Behavioral disengagement     | 0.67        | 0.50   | 0.79 |
| Religion                     | 0.63        | 0.00   | 0.90 |
| Substance use                | 0.56        | 0.00   | 0.89 |
| Denial                       | 0.41        | 0.00   | 0.65 |

**Table S17.** The results of the most frequently chosen stress coping strategies by social sciences students.

| Stress coping strategy       | Social sciences |        |      |
|------------------------------|-----------------|--------|------|
|                              | Mean            | Median | SD   |
| Acceptance                   | 2.04            | 2.00   | 0.74 |
| Emotional support            | 1.54            | 1.50   | 0.90 |
| Self-distraction             | 1.43            | 1.50   | 0.82 |
| Positive reframing           | 1.39            | 1.50   | 0.89 |
| Planning                     | 1.31            | 1.00   | 0.85 |
| Venting                      | 1.25            | 1.50   | 0.83 |
| Use of informational support | 1.13            | 1.00   | 0.88 |
| Active coping                | 0.95            | 1.00   | 0.73 |
| Humor                        | 0.94            | 1.00   | 0.65 |
| Behavioral disengagement     | 0.76            | 0.50   | 0.80 |
| Self-blame                   | 0.67            | 0.50   | 0.69 |
| Religion                     | 0.66            | 0.00   | 0.91 |
| Substance use                | 0.57            | 0.00   | 0.89 |
| Denial                       | 0.52            | 0.00   | 0.71 |

**Table S18.** The results of the most frequently chosen stress coping strategies by arts and humanities students.

| Stress coping strategy       | Arts and humanities |        |      |
|------------------------------|---------------------|--------|------|
|                              | Mean                | Median | SD   |
| Acceptance                   | 2.10                | 2.00   | 0.76 |
| Emotional support            | 1.49                | 1.50   | 1.00 |
| Self-distraction             | 1.35                | 1.50   | 0.85 |
| Planning                     | 1.33                | 1.50   | 0.82 |
| Positive reframing           | 1.31                | 1.25   | 0.94 |
| Venting                      | 1.26                | 1.50   | 0.86 |
| Humor                        | 1.09                | 1.00   | 0.68 |
| Use of informational support | 1.05                | 1.00   | 0.98 |
| Active coping                | 0.92                | 1.00   | 0.82 |
| Behavioral disengagement     | 0.79                | 0.50   | 0.82 |
| Religion                     | 0.74                | 0.00   | 0.99 |
| Self-blame                   | 0.70                | 0.50   | 0.71 |
| Substance use                | 0.57                | 0.00   | 0.87 |
| Denial                       | 0.45                | 0.00   | 0.65 |

**Table S19.** The results of the most frequently chosen stress coping strategies by sciences students.

| Stress coping strategy       | Sciences |        |      |
|------------------------------|----------|--------|------|
|                              | Mean     | Median | SD   |
| Acceptance                   | 2.02     | 2.00   | 0.82 |
| Emotional support            | 1.53     | 1.50   | 0.98 |
| Self-distraction             | 1.42     | 1.50   | 0.82 |
| Venting                      | 1.41     | 1.50   | 0.78 |
| Positive reframing           | 1.33     | 1.00   | 0.90 |
| Planning                     | 1.26     | 1.00   | 0.91 |
| Use of informational support | 1.17     | 1.00   | 0.91 |
| Humor                        | 1.07     | 1.00   | 0.63 |
| Active coping                | 0.88     | 1.00   | 0.78 |
| Self-blame                   | 0.83     | 0.50   | 0.69 |
| Behavioral disengagement     | 0.82     | 0.50   | 0.79 |
| Religion                     | 0.69     | 0.00   | 0.93 |
| Substance use                | 0.56     | 0.00   | 0.80 |
| Denial                       | 0.47     | 0.00   | 0.61 |

**Table S20.** The results of the most frequently chosen stress coping strategies without the usage of either psychological or psychiatric help before the pandemics outbreak.

| Did you use psychological/psychiatric help before the beginning of the pandemics? |      |      |        |      |
|-----------------------------------------------------------------------------------|------|------|--------|------|
| Stress coping strategy                                                            | No   |      |        |      |
|                                                                                   | N    | Mean | Median | SD   |
| Acceptance                                                                        | 1800 | 2.19 | 2.50   | 0.71 |
| Emotional support                                                                 |      | 1.57 | 1.50   | 0.92 |
| Planning                                                                          |      | 1.42 | 1.50   | 0.84 |
| Positive reframing                                                                |      | 1.40 | 1.50   | 0.89 |
| Self-distraction                                                                  |      | 1.40 | 1.50   | 0.81 |
| Venting                                                                           |      | 1.24 | 1.50   | 0.76 |
| Use of informational support                                                      |      | 1.14 | 1.00   | 0.85 |
| Humor                                                                             |      | 1.07 | 1.00   | 0.70 |
| Active coping                                                                     |      | 0.98 | 1.00   | 0.78 |
| Religion                                                                          |      | 0.80 | 0.50   | 0.98 |
| Self-blame                                                                        |      | 0.70 | 0.50   | 0.67 |
| Behavioral disengagement                                                          |      | 0.66 | 0.50   | 0.73 |
| Substance use                                                                     |      | 0.46 | 0.00   | 0.77 |
| Denial                                                                            |      | 0.43 | 0.00   | 0.64 |

**Table S21.** The results of the most frequently chosen stress coping strategies for the usage of psychological help before the pandemics outbreak.

| Did you use psychological/psychiatric help before the beginning of the pandemics? |                                    |      |        |      |
|-----------------------------------------------------------------------------------|------------------------------------|------|--------|------|
| Stress coping strategy                                                            | Yes, I used psychological services |      |        |      |
|                                                                                   | N                                  | Mean | Median | SD   |
| Acceptance                                                                        | 162                                | 2.25 | 2.50   | 0.71 |
| Emotional support                                                                 |                                    | 1.73 | 2.00   | 0.90 |
| Planning                                                                          |                                    | 1.70 | 1.50   | 0.82 |
| Self-distraction                                                                  |                                    | 1.66 | 1.50   | 0.71 |
| Positive reframing                                                                |                                    | 1.64 | 1.50   | 0.88 |
| Venting                                                                           |                                    | 1.58 | 1.50   | 0.74 |
| Use of informational support                                                      |                                    | 1.49 | 1.50   | 0.89 |
| Active coping                                                                     |                                    | 1.34 | 1.25   | 0.82 |
| Humor                                                                             |                                    | 1.15 | 1.00   | 0.70 |
| Self-blame                                                                        |                                    | 0.96 | 1.00   | 0.71 |
| Religion                                                                          |                                    | 0.89 | 0.50   | 1.01 |
| Behavioral disengagement                                                          |                                    | 0.81 | 0.75   | 0.75 |
| Substance use                                                                     |                                    | 0.48 | 0.00   | 0.76 |
| Denial                                                                            |                                    | 0.42 | 0.00   | 0.63 |

**Table S22.** The results of the most frequently chosen stress coping strategies for the usage of psychological and psychiatric help before the pandemics outbreak.

| Did you use psychological/psychiatric help before the beginning of the pandemics? |                                                    |      |        |      |
|-----------------------------------------------------------------------------------|----------------------------------------------------|------|--------|------|
| Stress coping strategy                                                            | Yes, I used psychological and psychiatric services |      |        |      |
|                                                                                   | N                                                  | Mean | Median | SD   |
| Acceptance                                                                        | 130                                                | 2.17 | 2.00   | 0.71 |
| Emotional support                                                                 |                                                    | 1.52 | 1.50   | 0.99 |
| Self-distraction                                                                  |                                                    | 1.52 | 1.50   | 0.83 |
| Venting                                                                           |                                                    | 1.42 | 1.50   | 0.82 |
| Use of informational support                                                      |                                                    | 1.33 | 1.50   | 0.93 |
| Positive reframing                                                                |                                                    | 1.31 | 1.00   | 0.96 |
| Planning                                                                          |                                                    | 1.28 | 1.00   | 0.89 |
| Humor                                                                             |                                                    | 1.15 | 1.00   | 0.71 |
| Self-blame                                                                        |                                                    | 1.09 | 1.00   | 0.87 |
| Behavioral disengagement                                                          |                                                    | 1.02 | 1.00   | 0.89 |
| Active coping                                                                     |                                                    | 0.90 | 1.00   | 0.81 |
| Substance use                                                                     |                                                    | 0.78 | 0.00   | 0.99 |
| Religion                                                                          |                                                    | 0.53 | 0.00   | 0.82 |
| Denial                                                                            |                                                    | 0.39 | 0.00   | 0.66 |

**Table S23.** The results of the most frequently chosen stress coping strategies for the usage of psychiatric help before the pandemics outbreak.

| Did you use psychological/psychiatric help before the beginning of the pandemics? |                                  |      |        |      |
|-----------------------------------------------------------------------------------|----------------------------------|------|--------|------|
| Stress coping strategy                                                            | Yes, I used psychiatric services |      |        |      |
|                                                                                   | N                                | Mean | Median | SD   |
| Acceptance                                                                        | 80                               | 2.19 | 2.50   | 0.76 |
| Emotional support                                                                 |                                  | 1.45 | 1.50   | 0.91 |
| Planning                                                                          |                                  | 1.44 | 1.50   | 0.88 |
| Self-distraction                                                                  |                                  | 1.41 | 1.50   | 0.73 |
| Humor                                                                             |                                  | 1.31 | 1.50   | 0.74 |
| Venting                                                                           |                                  | 1.28 | 1.25   | 0.79 |
| Use of informational support                                                      |                                  | 1.24 | 1.00   | 0.88 |
| Positive reframing                                                                |                                  | 1.23 | 1.00   | 0.93 |
| Self-blame                                                                        |                                  | 1.01 | 1.00   | 0.89 |
| Active coping                                                                     |                                  | 0.96 | 1.00   | 0.88 |
| Behavioral disengagement                                                          |                                  | 0.94 | 0.75   | 0.89 |
| Substance use                                                                     |                                  | 0.87 | 0.50   | 1.00 |
| Religion                                                                          |                                  | 0.60 | 0.00   | 0.83 |
| Denial                                                                            |                                  | 0.43 | 0.00   | 0.65 |

**Table S24.** The results of the most frequently chosen stress coping strategies for living alone.

| I live with:                 |       |      |        |      |
|------------------------------|-------|------|--------|------|
| Stress coping strategy       | Alone |      |        |      |
|                              | N     | Mean | Median | SD   |
| Acceptance                   | 231   | 2.26 | 2.50   | 0.77 |
| Planning                     |       | 1.60 | 1.50   | 0.89 |
| Positive reframing           |       | 1.58 | 1.50   | 0.99 |
| Emotional support            |       | 1.58 | 1.50   | 0.99 |
| Self-distraction             |       | 1.47 | 1.50   | 0.85 |
| Venting                      |       | 1.35 | 1.50   | 0.82 |
| Humor                        |       | 1.27 | 1.00   | 0.77 |
| Use of informational support |       | 1.21 | 1.00   | 0.94 |
| Active coping                |       | 1.17 | 1.00   | 0.93 |
| Religion                     |       | 0.89 | 0.50   | 1.02 |
| Self-blame                   |       | 0.83 | 1.00   | 0.71 |
| Behavioral disengagement     |       | 0.78 | 0.50   | 0.82 |
| Substance use                |       | 0.71 | 0.50   | 0.83 |
| Denial                       |       | 0.51 | 0.00   | 0.66 |

**Table S25.** The results of the most frequently chosen stress coping strategies for living with roommates.

| I live with:                 |           |      |        |      |
|------------------------------|-----------|------|--------|------|
| Stress coping strategy       | Roommates |      |        |      |
|                              | N         | Mean | Median | SD   |
| Acceptance                   | 565       | 2.21 | 2.50   | 0.67 |
| Emotional support            |           | 1.60 | 1.50   | 0.92 |
| Planning                     |           | 1.47 | 1.50   | 0.85 |
| Self-distraction             |           | 1.45 | 1.50   | 0.80 |
| Positive reframing           |           | 1.44 | 1.50   | 0.89 |
| Venting                      |           | 1.33 | 1.50   | 0.77 |
| Use of informational support |           | 1.23 | 1.00   | 0.86 |
| Humor                        |           | 1.10 | 1.00   | 0.70 |
| Active coping                |           | 0.98 | 1.00   | 0.78 |
| Religion                     |           | 0.85 | 0.50   | 0.97 |
| Self-blame                   |           | 0.82 | 0.50   | 0.70 |
| Behavioral disengagement     |           | 0.74 | 0.50   | 0.77 |
| Substance use                |           | 0.61 | 0.00   | 0.88 |
| Denial                       |           | 0.46 | 0.00   | 0.67 |

**Table S26.** The results of the most frequently chosen stress coping strategies for living with parents.

| I live with:                 |         |      |        |      |
|------------------------------|---------|------|--------|------|
| Stress coping strategy       | Parents |      |        |      |
|                              | N       | Mean | Median | SD   |
| Acceptance                   | 1049    | 2.16 | 2.00   | 0.72 |
| Emotional support            |         | 1.49 | 1.50   | 0.92 |
| Self-distraction             |         | 1.43 | 1.50   | 0.78 |
| Planning                     |         | 1.38 | 1.50   | 0.83 |
| Positive reframing           |         | 1.37 | 1.50   | 0.89 |
| Venting                      |         | 1.26 | 1.50   | 0.76 |
| Use of informational support |         | 1.14 | 1.00   | 0.86 |
| Humor                        |         | 1.08 | 1.00   | 0.70 |
| Active coping                |         | 0.96 | 1.00   | 0.78 |
| Religion                     |         | 0.82 | 0.50   | 1.00 |
| Self-blame                   |         | 0.75 | 0.50   | 0.71 |
| Behavioral disengagement     |         | 0.71 | 0.50   | 0.76 |
| Substance use                |         | 0.41 | 0.00   | 0.73 |
| Denial                       |         | 0.40 | 0.00   | 0.63 |

**Table S27.** The results of the most frequently chosen stress coping strategies for living with partner or spouse.

| I live with:                 |                   |      |        |      |
|------------------------------|-------------------|------|--------|------|
| Stress coping strategy       | Partner or spouse |      |        |      |
|                              | N                 | Mean | Median | SD   |
| Acceptance                   | 301               | 2.24 | 2.50   | 0.70 |
| Emotional support            |                   | 1.81 | 2.00   | 0.90 |
| Planning                     |                   | 1.44 | 1.50   | 0.84 |
| Positive reframing           |                   | 1.39 | 1.50   | 0.86 |
| Self-distraction             |                   | 1.32 | 1.50   | 0.85 |
| Use of informational support |                   | 1.25 | 1.00   | 0.85 |
| Venting                      |                   | 1.19 | 1.00   | 0.80 |
| Active coping                |                   | 1.06 | 1.00   | 0.78 |
| Humor                        |                   | 1.00 | 1.00   | 0.67 |
| Self-blame                   |                   | 0.60 | 0.50   | 0.65 |
| Behavioral disengagement     |                   | 0.53 | 0.50   | 0.65 |
| Religion                     |                   | 0.51 | 0.00   | 0.78 |
| Substance use                |                   | 0.44 | 0.00   | 0.78 |
| Denial                       |                   | 0.36 | 0.00   | 0.59 |

**Table S28.** The results of the most frequently chosen stress coping strategies for living with partner or spouse and children.

| I live with:                 |                                |      |        |      |
|------------------------------|--------------------------------|------|--------|------|
| Stress coping strategy       | Partner or spouse and children |      |        |      |
|                              | N                              | Mean | Median | SD   |
| Acceptance                   | 21                             | 2.12 | 2.50   | 0.71 |
| Emotional support            |                                | 1.86 | 1.50   | 0.81 |
| Self-distraction             |                                | 1.38 | 1.50   | 0.76 |
| Positive reframing           |                                | 1.38 | 1.50   | 0.71 |
| Planning                     |                                | 1.57 | 2.00   | 0.86 |
| Venting                      |                                | 1.19 | 1.00   | 0.56 |
| Use of informational support |                                | 1.05 | 1.00   | 0.63 |
| Active coping                |                                | 0.90 | 1.00   | 0.64 |
| Humor                        |                                | 0.67 | 0.50   | 0.64 |
| Religion                     |                                | 0.64 | 0.00   | 0.95 |
| Behavioral disengagement     |                                | 0.48 | 0.00   | 0.64 |
| Denial                       |                                | 0.40 | 0.00   | 0.54 |
| Self-blame                   |                                | 0.36 | 0.00   | 0.50 |
| Substance use                |                                | 0.19 | 0.00   | 0.51 |

**Table S29.** The results of the most frequently chosen stress coping strategies for change of the lifestyle.

| What was the most difficult for you during pandemics? |                         |      |        |      |
|-------------------------------------------------------|-------------------------|------|--------|------|
| Coping stress strategy                                | Change of the lifestyle |      |        |      |
|                                                       | N                       | Mean | Median | SD   |
| Acceptance                                            | 312                     | 2.15 | 2.50   | 0.74 |
| Emotional support                                     |                         | 1.46 | 1.50   | 0.95 |
| Self-distraction                                      |                         | 1.36 | 1.50   | 0.80 |
| Planning                                              |                         | 1.35 | 1.50   | 0.86 |
| Positive reframing                                    |                         | 1.31 | 1.50   | 0.84 |
| Venting                                               |                         | 1.29 | 1.50   | 0.81 |
| Humor                                                 |                         | 1.13 | 1.00   | 0.69 |
| Use of informational support                          |                         | 1.12 | 1.00   | 0.90 |
| Active coping                                         |                         | 0.87 | 1.00   | 0.74 |
| Behavioral disengagement                              |                         | 0.80 | 0.50   | 0.84 |
| Religion                                              |                         | 0.72 | 0.00   | 0.97 |
| Self-blame                                            |                         | 0.71 | 0.50   | 0.69 |
| Substance use                                         |                         | 0.53 | 0.00   | 0.82 |
| Denial                                                |                         | 0.41 | 0.00   | 0.65 |

**Table S30.** The results of the most frequently chosen stress coping strategies for changes awaiting the world after the pandemics.

| What was the most difficult for you during pandemics? |                                                |      |        |      |
|-------------------------------------------------------|------------------------------------------------|------|--------|------|
| Coping stress strategy                                | Changes awaiting the world after the pandemics |      |        |      |
|                                                       | N                                              | Mean | Median | SD   |
| Acceptance                                            | 446                                            | 2.28 | 2.50   | 0.68 |
| Emotional support                                     |                                                | 1.66 | 1.50   | 0.92 |
| Planning                                              |                                                | 1.59 | 1.50   | 0.87 |
| Positive reframing                                    |                                                | 1.44 | 1.50   | 0.93 |
| Self-distraction                                      |                                                | 1.44 | 1.50   | 0.81 |
| Venting                                               |                                                | 1.26 | 1.50   | 0.76 |
| Use of informational support                          |                                                | 1.21 | 1.00   | 0.88 |
| Humor                                                 |                                                | 1.14 | 1.00   | 0.69 |
| Active coping                                         |                                                | 1.02 | 1.00   | 0.81 |
| Religion                                              |                                                | 0.75 | 0.00   | 0.96 |
| Self-blame                                            |                                                | 0.73 | 0.50   | 0.69 |
| Behavioral disengagement                              |                                                | 0.66 | 0.50   | 0.74 |
| Substance use                                         |                                                | 0.47 | 0.00   | 0.77 |
| Denial                                                |                                                | 0.33 | 0.00   | 0.56 |

**Table S31.** The results of the most frequently chosen stress coping strategies for fear of infection of the loved ones.

| What was the most difficult for you during pandemics? |                                     |      |        |      |
|-------------------------------------------------------|-------------------------------------|------|--------|------|
| Coping stress strategy                                | Fear of infection of the loved ones |      |        |      |
|                                                       | N                                   | Mean | Median | SD   |
| Acceptance                                            | 730                                 | 2.21 | 2.50   | 0.67 |
| Emotional support                                     |                                     | 1.70 | 2.00   | 0.90 |
| Self-distraction                                      |                                     | 1.49 | 1.50   | 0.80 |
| Planning                                              |                                     | 1.45 | 1.50   | 0.79 |
| Positive reframing                                    |                                     | 1.45 | 1.50   | 0.85 |
| Venting                                               |                                     | 1.29 | 1.50   | 0.75 |
| Use of informational support                          |                                     | 1.26 | 1.00   | 0.85 |
| Active coping                                         |                                     | 1.05 | 1.00   | 0.78 |
| Humor                                                 |                                     | 0.95 | 1.00   | 0.66 |
| Religion                                              |                                     | 0.93 | 1.00   | 0.99 |
| Self-blame                                            |                                     | 0.72 | 0.50   | 0.66 |
| Behavioral disengagement                              |                                     | 0.63 | 0.50   | 0.69 |
| Denial                                                |                                     | 0.45 | 0.00   | 0.63 |
| Substance use                                         |                                     | 0.43 | 0.00   | 0.72 |



**Table S32.** The results of the most frequently chosen stress coping strategies for financial instability.

| What was the most difficult for you during pandemics? |                       |      |        |      |
|-------------------------------------------------------|-----------------------|------|--------|------|
| Coping stress strategy                                | Financial instability |      |        |      |
|                                                       | N                     | Mean | Median | SD   |
| Acceptance                                            | 157                   | 2.17 | 2.00   | 0.75 |
| Emotional support                                     |                       | 1.57 | 1.50   | 0.97 |
| Planning                                              |                       | 1.42 | 1.50   | 0.91 |
| Self-distraction                                      |                       | 1.37 | 1.50   | 0.85 |
| Positive reframing                                    |                       | 1.32 | 1.00   | 0.97 |
| Humor                                                 |                       | 1.20 | 1.00   | 0.77 |
| Venting                                               |                       | 1.20 | 1.50   | 0.80 |
| Use of informational support                          |                       | 1.08 | 1.00   | 0.85 |
| Active coping                                         |                       | 1.02 | 1.00   | 0.86 |
| Self-blame                                            |                       | 0.81 | 0.50   | 0.80 |
| Behavioral disengagement                              |                       | 0.79 | 0.50   | 0.81 |
| Religion                                              |                       | 0.61 | 0.00   | 0.93 |
| Substance use                                         |                       | 0.56 | 0.00   | 0.86 |
| Denial                                                |                       | 0.46 | 0.00   | 0.65 |

**Table S33.** The results of the most frequently chosen stress coping strategies for isolation.

| What was the most difficult for you during pandemics? |           |      |        |      |
|-------------------------------------------------------|-----------|------|--------|------|
| Coping stress strategy                                | Isolation |      |        |      |
|                                                       | N         | Mean | Median | SD   |
| Acceptance                                            | 224       | 2.15 | 2.50   | 0.74 |
| Emotional support                                     |           | 1.50 | 1.50   | 0.93 |
| Positive reframing                                    |           | 1.46 | 1.50   | 0.89 |
| Planning                                              |           | 1.42 | 1.50   | 0.82 |
| Self-distraction                                      |           | 1.41 | 1.50   | 0.75 |
| Venting                                               |           | 1.29 | 1.50   | 0.74 |
| Use of informational support                          |           | 1.15 | 1.00   | 0.84 |
| Humor                                                 |           | 1.16 | 1.00   | 0.71 |
| Active coping                                         |           | 1.01 | 1.00   | 0.80 |
| Self-blame                                            |           | 0.71 | 0.50   | 0.65 |
| Religion                                              |           | 0.67 | 0.00   | 0.91 |
| Substance use                                         |           | 0.61 | 0.00   | 0.89 |
| Behavioral disengagement                              |           | 0.61 | 0.50   | 0.71 |
| Denial                                                |           | 0.44 | 0.00   | 0.68 |

**Table S34.** The results of the most frequently chosen stress coping strategies for loneliness.

| What was the most difficult for you during pandemics? |            |      |        |      |
|-------------------------------------------------------|------------|------|--------|------|
| Coping stress strategy                                | Loneliness |      |        |      |
|                                                       | N          | Mean | Median | SD   |
| Acceptance                                            | 158        | 2.06 | 2.00   | 0.75 |
| Self-distraction                                      |            | 1.49 | 1.50   | 0.71 |
| Venting                                               |            | 1.46 | 1.50   | 0.73 |
| Positive reframing                                    |            | 1.30 | 1.00   | 0.91 |
| Emotional support                                     |            | 1.29 | 1.00   | 0.83 |
| Planning                                              |            | 1.27 | 1.00   | 0.81 |
| Use of informational support                          |            | 1.14 | 1.00   | 0.83 |
| Self-blame                                            |            | 1.13 | 1.00   | 0.77 |
| Humor                                                 |            | 1.12 | 1.00   | 0.72 |
| Behavioral disengagement                              |            | 1.00 | 1.00   | 0.84 |
| Active coping                                         |            | 0.99 | 1.00   | 0.78 |
| Religion                                              |            | 0.68 | 0.00   | 0.90 |
| Substance use                                         |            | 0.67 | 0.00   | 0.89 |
| Denial                                                |            | 0.55 | 0.00   | 0.73 |

**Table S35.** The results of the most frequently chosen stress coping strategies for concern about education.

| What was the most difficult for you during pandemics? |                         |      |        |      |
|-------------------------------------------------------|-------------------------|------|--------|------|
| Coping stress strategy                                | Concern about education |      |        |      |
|                                                       | N                       | Mean | Median | SD   |
| Acceptance                                            | 47                      | 2.20 | 2.50   | 0.83 |
| Positive reframing                                    |                         | 1.48 | 1.50   | 0.99 |
| Planning                                              |                         | 1.37 | 1.50   | 0.93 |
| Emotional support                                     |                         | 1.30 | 1.50   | 0.96 |
| Humor                                                 |                         | 1.23 | 1.50   | 0.77 |
| Self-distraction                                      |                         | 1.04 | 1.00   | 0.80 |
| Use of informational support                          |                         | 1.00 | 1.00   | 0.90 |
| Venting                                               |                         | 0.94 | 1.00   | 0.75 |
| Active coping                                         |                         | 0.91 | 1.00   | 0.82 |
| Self-blame                                            |                         | 0.73 | 0.50   | 0.74 |
| Religion                                              |                         | 0.64 | 0.00   | 0.91 |
| Behavioral disengagement                              |                         | 0.51 | 0.50   | 0.62 |
| Substance use                                         |                         | 0.31 | 0.00   | 0.61 |
| Denial                                                |                         | 0.16 | 0.00   | 0.31 |

**Table S36.** The results of the most frequently chosen stress coping strategies for fear of being infected.

| What was the most difficult for you during pandemics? |                        |      |        |      |
|-------------------------------------------------------|------------------------|------|--------|------|
| Coping stress strategy                                | Fear of being infected |      |        |      |
|                                                       | N                      | Mean | Median | SD   |
| Acceptance                                            | 69                     | 2.06 | 2.00   | 0.70 |
| Emotional support                                     |                        | 1.63 | 1.50   | 0.80 |
| Self-distraction                                      |                        | 1.59 | 2.00   | 0.86 |
| Positive reframing                                    |                        | 1.50 | 1.50   | 1.01 |
| Planning                                              |                        | 1.43 | 1.50   | 0.85 |
| Venting                                               |                        | 1.41 | 1.50   | 0.86 |
| Use of informational support                          |                        | 1.22 | 1.00   | 0.81 |
| Active coping                                         |                        | 1.12 | 1.00   | 0.81 |
| Religion                                              |                        | 1.06 | 1.00   | 1.09 |
| Humor                                                 |                        | 1.04 | 1.00   | 0.73 |
| Behavioral disengagement                              |                        | 0.88 | 1.00   | 0.86 |
| Denial                                                |                        | 0.80 | 0.50   | 0.80 |
| Self-blame                                            |                        | 0.74 | 0.50   | 0.72 |
| Substance use                                         |                        | 0.56 | 0.00   | 0.93 |

**Table S37.** The results of the most frequently chosen stress coping strategies for being not afraid.

| What was the most difficult for you during pandemics? |                  |      |        |      |
|-------------------------------------------------------|------------------|------|--------|------|
| Coping stress strategy                                | I was not afraid |      |        |      |
|                                                       | N                | Mean | Median | SD   |
| Acceptance                                            | 26               | 2.40 | 2.50   | 0.84 |
| Humor                                                 |                  | 1.85 | 1.75   | 0.96 |
| Positive reframing                                    |                  | 1.21 | 1.25   | 1.12 |
| Emotional support                                     |                  | 0.85 | 0.00   | 1.16 |
| Planning                                              |                  | 0.73 | 0.50   | 0.96 |
| Use of informational support                          |                  | 0.56 | 0.00   | 0.92 |
| Venting                                               |                  | 0.50 | 0.00   | 0.77 |
| Self-distraction                                      |                  | 0.48 | 0.00   | 0.75 |
| Religion                                              |                  | 0.46 | 0.00   | 0.89 |
| Active coping                                         |                  | 0.38 | 0.00   | 0.79 |
| Substance use                                         |                  | 0.31 | 0.00   | 0.72 |
| Behavioral disengagement                              |                  | 0.23 | 0.00   | 0.32 |
| Self-blame                                            |                  | 0.19 | 0.00   | 0.38 |
| Denial                                                |                  | 0.06 | 0.00   | 0.22 |

**Table S38.** The results of the most frequently chosen stress coping strategies for working mentally.

| Are you currently working?   |     |                 |        |      |
|------------------------------|-----|-----------------|--------|------|
| Stress coping strategy       | N   | I work mentally |        |      |
|                              |     | Mean            | Median | SD   |
| Acceptance                   | 249 | 2.20            | 2.50   | 0.73 |
| Emotional support            |     | 1.55            | 1.50   | 0.93 |
| Positive reframing           |     | 1.51            | 1.50   | 0.90 |
| Self-distraction             |     | 1.48            | 1.50   | 0.88 |
| Planning                     |     | 1.46            | 1.50   | 0.90 |
| Active coping                |     | 1.15            | 1.00   | 0.85 |
| Venting                      |     | 1.16            | 1.00   | 0.80 |
| Use of informational support |     | 1.10            | 1.00   | 0.86 |
| Humor                        |     | 1.07            | 1.00   | 0.68 |
| Religion                     |     | 0.78            | 0.00   | 0.97 |
| Self-blame                   |     | 0.58            | 0.50   | 0.63 |
| Behavioral disengagement     |     | 0.53            | 0.00   | 0.70 |
| Substance use                |     | 0.51            | 0.00   | 0.81 |
| Denial                       |     | 0.42            | 0.00   | 0.65 |

**Table S39.** The results of the most frequently chosen stress coping strategies for running own business.

| Are you currently working?   |    |                       |        |      |
|------------------------------|----|-----------------------|--------|------|
| Stress coping strategy       | N  | I run my own business |        |      |
|                              |    | Mean                  | Median | SD   |
| Acceptance                   | 28 | 2.34                  | 2.50   | 0.77 |
| Planning                     |    | 1.80                  | 2.00   | 0.90 |
| Positive reframing           |    | 1.70                  | 1.50   | 0.92 |
| Emotional support            |    | 1.52                  | 1.50   | 1.00 |
| Self-distraction             |    | 1.50                  | 1.50   | 0.77 |
| Humor                        |    | 1.34                  | 1.25   | 0.78 |
| Active coping                |    | 1.23                  | 1.00   | 0.98 |
| Venting                      |    | 1.25                  | 1.00   | 0.88 |
| Use of informational support |    | 1.20                  | 1.00   | 1.02 |
| Religion                     |    | 0.70                  | 0.00   | 1.07 |
| Substance use                |    | 0.66                  | 0.00   | 1.06 |
| Denial                       |    | 0.46                  | 0.00   | 0.82 |
| Self-blame                   |    | 0.45                  | 0.00   | 0.60 |
| Behavioral disengagement     |    | 0.38                  | 0.00   | 0.68 |

**Table S40.** The results of the most frequently chosen stress coping strategies for not working.

| Are you currently working?   |      |                   |        |      |
|------------------------------|------|-------------------|--------|------|
| Stress coping strategy       | N    | No, I do not work |        |      |
|                              |      | Mean              | Median | SD   |
| Acceptance                   | 1799 | 2.19              | 2.50   | 0.70 |
| Emotional support            |      | 1.58              | 1.50   | 0.93 |
| Planning                     |      | 1.44              | 1.50   | 0.84 |
| Self-distraction             |      | 1.42              | 1.50   | 0.79 |
| Positive reframing           |      | 1.40              | 1.50   | 0.90 |
| Venting                      |      | 1.30              | 1.50   | 0.77 |
| Use of informational support |      | 1.20              | 1.00   | 0.86 |
| Humor                        |      | 1.09              | 1.00   | 0.71 |
| Active coping                |      | 0.97              | 1.00   | 0.78 |
| Religion                     |      | 0.79              | 0.50   | 0.97 |
| Self-blame                   |      | 0.79              | 0.50   | 0.71 |
| Behavioral disengagement     |      | 0.73              | 0.50   | 0.76 |
| Substance use                |      | 0.48              | 0.00   | 0.78 |
| Denial                       |      | 0.42              | 0.00   | 0.63 |

**Table S41.** The results of the most frequently chosen stress coping strategies for working physically.

| Are you currently working?   |    |                   |        |      |
|------------------------------|----|-------------------|--------|------|
| Stress coping strategy       | N  | I work physically |        |      |
|                              |    | Mean              | Median | SD   |
| Acceptance                   | 96 | 2.16              | 2.00   | 0.76 |
| Emotional support            |    | 1.59              | 1.50   | 0.92 |
| Self-distraction             |    | 1.41              | 1.50   | 0.78 |
| Planning                     |    | 1.28              | 1.25   | 0.77 |
| Positive reframing           |    | 1.28              | 1.00   | 0.87 |
| Venting                      |    | 1.13              | 1.00   | 0.68 |
| Use of informational support |    | 1.12              | 1.00   | 0.85 |
| Active coping                |    | 1.09              | 1.00   | 0.82 |
| Humor                        |    | 1.07              | 1.00   | 0.69 |
| Substance use                |    | 0.78              | 1.00   | 0.88 |
| Religion                     |    | 0.70              | 0.25   | 0.88 |
| Self-blame                   |    | 0.67              | 0.50   | 0.69 |
| Behavioral disengagement     |    | 0.63              | 0.50   | 0.70 |
| Denial                       |    | 0.50              | 0.00   | 0.70 |

**Table S42.** The results of the most frequently chosen stress coping strategies for having a stable family income and no changes in the economic situation.

| How do you assess your economic situation during pandemics? |                                                    |      |        |      |
|-------------------------------------------------------------|----------------------------------------------------|------|--------|------|
| Stress coping strategy                                      | I have a stable family income, nothing has changed |      |        |      |
|                                                             | N                                                  | Mean | Median | SD   |
| Acceptance                                                  | 1278                                               | 2.22 | 2.50   | 0.70 |
| Emotional support                                           |                                                    | 1.55 | 1.50   | 0.94 |
| Positive reframing                                          |                                                    | 1.43 | 1.50   | 0.90 |
| Planning                                                    |                                                    | 1.37 | 1.50   | 0.85 |
| Self-distraction                                            |                                                    | 1.36 | 1.50   | 0.81 |
| Venting                                                     |                                                    | 1.21 | 1.00   | 0.76 |
| Use of informational support                                |                                                    | 1.15 | 1.00   | 0.87 |
| Humor                                                       |                                                    | 1.11 | 1.00   | 0.72 |
| Active coping                                               |                                                    | 0.93 | 1.00   | 0.78 |
| Religion                                                    |                                                    | 0.81 | 0.50   | 0.97 |
| Self-blame                                                  |                                                    | 0.69 | 0.50   | 0.68 |
| Behavioral disengagement                                    |                                                    | 0.62 | 0.50   | 0.72 |
| Substance use                                               |                                                    | 0.44 | 0.00   | 0.74 |
| Denial                                                      |                                                    | 0.37 | 0.00   | 0.60 |

**Table S43.** The results of the most frequently chosen stress coping strategies for having barely money for living.

| How do you assess your economic situation during pandemics? |                                       |      |        |      |
|-------------------------------------------------------------|---------------------------------------|------|--------|------|
| Stress coping strategy                                      | I barely have enough money for living |      |        |      |
|                                                             | N                                     | Mean | Median | SD   |
| Acceptance                                                  | 31                                    | 1.81 | 2.00   | 0.93 |
| Self-distraction                                            |                                       | 1.47 | 1.50   | 0.87 |
| Emotional support                                           |                                       | 1.39 | 1.00   | 1.03 |
| Positive reframing                                          |                                       | 1.34 | 1.50   | 0.93 |
| Venting                                                     |                                       | 1.31 | 1.00   | 0.87 |
| Self-blame                                                  |                                       | 1.27 | 1.00   | 1.06 |
| Planning                                                    |                                       | 1.24 | 1.00   | 0.87 |
| Behavioral disengagement                                    |                                       | 1.19 | 1.00   | 1.02 |
| Use of informational support                                |                                       | 1.02 | 1.00   | 0.79 |
| Active coping                                               |                                       | 0.95 | 1.00   | 0.87 |
| Humor                                                       |                                       | 0.95 | 1.00   | 0.75 |
| Substance use                                               |                                       | 0.84 | 0.00   | 1.07 |
| Denial                                                      |                                       | 0.82 | 1.00   | 0.83 |
| Religion                                                    |                                       | 0.69 | 0.00   | 1.03 |

**Table S44.** The results of the most frequently chosen stress coping strategies for having a stable family income, but worse economic situation than before

| How do you assess your economic situation during pandemics? |                                                                       |      |        |      |
|-------------------------------------------------------------|-----------------------------------------------------------------------|------|--------|------|
| Stress coping strategy                                      | I have a stable family income, but the situation is worse than before |      |        |      |
|                                                             | N                                                                     | Mean | Median | SD   |
| Acceptance                                                  | 647                                                                   | 2.19 | 2.00   | 0.69 |
| Emotional support                                           |                                                                       | 1.63 | 1.50   | 0.88 |
| Self-distraction                                            |                                                                       | 1.53 | 1.50   | 0.78 |
| Planning                                                    |                                                                       | 1.52 | 1.50   | 0.81 |
| Positive reframing                                          |                                                                       | 1.41 | 1.50   | 0.86 |
| Venting                                                     |                                                                       | 1.37 | 1.50   | 0.77 |
| Use of informational support                                |                                                                       | 1.25 | 1.00   | 0.85 |
| Active coping                                               |                                                                       | 1.09 | 1.00   | 0.79 |
| Humor                                                       |                                                                       | 1.06 | 1.00   | 0.66 |
| Self-blame                                                  |                                                                       | 0.80 | 0.50   | 0.71 |
| Religion                                                    |                                                                       | 0.77 | 0.50   | 0.96 |
| Behavioral disengagement                                    |                                                                       | 0.76 | 0.50   | 0.76 |
| Substance use                                               |                                                                       | 0.48 | 0.00   | 0.78 |
| Denial                                                      |                                                                       | 0.46 | 0.00   | 0.65 |

**Table S45.** The results of the most frequently chosen stress coping strategies for borrowing money during the outbreak of the pandemic

| How do you assess your economic situation during pandemics? |                                                                                   |      |        |      |
|-------------------------------------------------------------|-----------------------------------------------------------------------------------|------|--------|------|
| Stress coping strategy                                      | I have to borrow money from my family/friends during the outbreak of the pandemic |      |        |      |
|                                                             | N                                                                                 | Mean | Median | SD   |
| Acceptance                                                  | 25                                                                                | 1.92 | 2.00   | 0.83 |
| Planning                                                    |                                                                                   | 1.52 | 1.50   | 1.02 |
| Self-distraction                                            |                                                                                   | 1.48 | 1.50   | 0.78 |
| Behavioral disengagement                                    |                                                                                   | 1.38 | 1.50   | 0.71 |
| Venting                                                     |                                                                                   | 1.28 | 1.00   | 0.93 |
| Active coping                                               |                                                                                   | 1.14 | 1.00   | 0.94 |
| Emotional support                                           |                                                                                   | 1.14 | 1.00   | 1.07 |
| Positive reframing                                          |                                                                                   | 1.12 | 1.00   | 0.98 |
| Substance use                                               |                                                                                   | 1.10 | 1.00   | 0.92 |
| Humor                                                       |                                                                                   | 1.10 | 1.00   | 0.87 |
| Self-blame                                                  |                                                                                   | 1.06 | 1.00   | 0.74 |
| Use of informational support                                |                                                                                   | 0.94 | 0.50   | 0.95 |
| Religion                                                    |                                                                                   | 0.78 | 0.00   | 1.08 |
| Denial                                                      |                                                                                   | 0.76 | 0.50   | 0.71 |

**Table S46.** The results of the most frequently chosen stress coping strategies for a need to start using savings.

| How do you assess your economic situation during pandemics? |                               |      |        |      |
|-------------------------------------------------------------|-------------------------------|------|--------|------|
| Stress coping strategy                                      | I have to start using savings |      |        |      |
|                                                             | N                             | Mean | Median | SD   |
| Acceptance                                                  | 191                           | 2.11 | 2.00   | 0.78 |
| Emotional support                                           |                               | 1.67 | 2.00   | 0.93 |
| Planning                                                    |                               | 1.61 | 1.50   | 0.88 |
| Self-distraction                                            |                               | 1.51 | 1.50   | 0.79 |
| Venting                                                     |                               | 1.38 | 1.50   | 0.79 |
| Positive reframing                                          |                               | 1.35 | 1.50   | 0.95 |
| Use of informational support                                |                               | 1.26 | 1.00   | 0.86 |
| Active coping                                               |                               | 1.14 | 1.00   | 0.82 |
| Humor                                                       |                               | 1.08 | 1.00   | 0.73 |
| Behavioral disengagement                                    |                               | 0.85 | 1.00   | 0.82 |
| Self-blame                                                  |                               | 0.85 | 1.00   | 0.72 |
| Substance use                                               |                               | 0.79 | 0.00   | 1.02 |
| Religion                                                    |                               | 0.72 | 0.00   | 0.96 |
| Denial                                                      |                               | 0.59 | 0.00   | 0.76 |



**Table S47.** The results of using informational support for the field of study.

| Use of informational support  |      |        |      |                           |                                          |                 |                                             |
|-------------------------------|------|--------|------|---------------------------|------------------------------------------|-----------------|---------------------------------------------|
| Field of study                | Mean | Median | SD   | Kruskal– Wallis<br>H test | Bonferroni correction<br><i>p</i> -value | <i>z</i> -value | Multiple comparisons*<br>( <i>p</i> -value) |
| <b>I. Arts and humanities</b> | 1.05 | 1.00   | 0.98 | 20.74                     | 0.01                                     | 0.0004          | III vs. IV<br>(0.002)                       |
| <b>II. Sciences</b>           | 1.17 | 1.00   | 0.91 |                           |                                          |                 |                                             |
| <b>III. Medicine</b>          | 1.24 | 1.00   | 0.85 |                           |                                          |                 |                                             |
| <b>IV. Engineering</b>        | 0.99 | 1.00   | 0.77 |                           |                                          |                 |                                             |
| <b>V. Social sciences</b>     | 1.13 | 1.00   | 0.88 |                           |                                          |                 |                                             |
|                               |      |        |      |                           |                                          | 3.70            |                                             |

\*only significant.

**Table S48.** The results of venting for the field of study.

| Venting                       |      |        |      |                           |                                          |                 |                                               |
|-------------------------------|------|--------|------|---------------------------|------------------------------------------|-----------------|-----------------------------------------------|
| Field of study                | Mean | Median | SD   | Kruskal– Wallis<br>H test | Bonferroni correction<br><i>p</i> -value | <i>z</i> -value | Multiple comparisons*<br>( <i>p</i> -value)   |
| <b>I. Arts and humanities</b> | 1.26 | 1.50   | 0.86 | 18.39                     | 0.01                                     | 0.0010          | II vs. IV<br>(0.008)<br>III vs. IV<br>(0.001) |
| <b>II. Sciences</b>           | 1.41 | 1.50   | 0.78 |                           |                                          |                 |                                               |
| <b>III. Medicine</b>          | 1.30 | 1.50   | 0.74 |                           |                                          |                 |                                               |
| <b>IV. Engineering</b>        | 1.10 | 1.00   | 0.78 |                           |                                          |                 |                                               |
| <b>V. Social sciences</b>     | 1.25 | 1.50   | 0.83 |                           |                                          |                 |                                               |
|                               |      |        |      |                           |                                          | 3.83            |                                               |

\*only significant.

**Table S49.** The results of planning for the field of study.

| Planning                      |      |        |      |                           |                                          |                 |                                             |
|-------------------------------|------|--------|------|---------------------------|------------------------------------------|-----------------|---------------------------------------------|
| Field of study                | Mean | Median | SD   | Kruskal– Wallis<br>H test | Bonferroni correction<br><i>p</i> -value | <i>z</i> -value | Multiple comparisons*<br>( <i>p</i> -value) |
| <b>I. Arts and humanities</b> | 1.33 | 1.50   | 0.82 | 25.30                     | 0.01                                     | 0.00001         | III vs. V<br>(0.0001)                       |
| <b>II. Sciences</b>           | 1.26 | 1.00   | 0.91 |                           |                                          |                 |                                             |
| <b>III. Medicine</b>          | 1.50 | 1.50   | 0.83 |                           |                                          |                 |                                             |
| <b>IV. Engineering</b>        | 1.39 | 1.50   | 0.87 |                           |                                          |                 |                                             |
| <b>V. Social sciences</b>     | 1.31 | 1.00   | 0.85 |                           |                                          |                 |                                             |
|                               |      |        |      |                           |                                          | 4.16            |                                             |

\*only significant.

**Table S50.** The results of humor for the field of study.

| Humor                  |      |        |      |                           |                                          |                 |                                              |
|------------------------|------|--------|------|---------------------------|------------------------------------------|-----------------|----------------------------------------------|
| Field of study         | Mean | Median | SD   | Kruskal– Wallis<br>H test | Bonferroni correction<br><i>p</i> -value | <i>z</i> -value | Multiple comparisons*<br>( <i>p</i> -value)  |
| I. Arts and humanities | 1.09 | 1.00   | 0.68 | 22.39                     | 0.01                                     | 0.0002          | III vs. V<br>(0.0001)<br>IV vs. V<br>(0.007) |
| II. Sciences           | 1.07 | 1.00   | 0.63 |                           |                                          |                 |                                              |
| III. Medicine          | 1.13 | 1.00   | 0.73 |                           |                                          |                 |                                              |
| IV. Engineering        | 1.13 | 1.00   | 0.71 |                           |                                          |                 |                                              |
| V. Social sciences     | 0.94 | 1.00   | 0.65 |                           |                                          |                 |                                              |

\*only significant.

**Table S51.** The results of acceptance for the field of study.

| Acceptance             |      |        |      |                           |                                          |                 |                                             |
|------------------------|------|--------|------|---------------------------|------------------------------------------|-----------------|---------------------------------------------|
| Field of study         | Mean | Median | SD   | Kruskal– Wallis<br>H test | Bonferroni correction<br><i>p</i> -value | <i>z</i> -value | Multiple comparisons*<br>( <i>p</i> -value) |
| I. Arts and humanities | 2.10 | 2.00   | 0.76 | 37.08                     | 0.01                                     | 0.00001         | III vs. V<br>(0.0001)                       |
| II. Sciences           | 2.02 | 2.00   | 0.82 |                           |                                          |                 |                                             |
| III. Medicine          | 2.26 | 2.50   | 0.68 |                           |                                          |                 |                                             |
| IV. Engineering        | 2.18 | 2.50   | 0.73 |                           |                                          |                 |                                             |
| V. Social sciences     | 2.04 | 2.00   | 0.74 |                           |                                          |                 |                                             |

\*only significant.

**Table S52.** The results of religion for the field of study.

| Religion               |      |        |      |                           |                                          |                 |                                             |
|------------------------|------|--------|------|---------------------------|------------------------------------------|-----------------|---------------------------------------------|
| Field of study         | Mean | Median | SD   | Kruskal– Wallis<br>H test | Bonferroni correction<br><i>p</i> -value | <i>z</i> -value | Multiple comparisons*<br>( <i>p</i> -value) |
| I. Arts and humanities | 0.74 | 0.00   | 0.99 | 27.07                     | 0.01                                     | 0.00001         | III vs. V<br>(0.001)                        |
| II. Sciences           | 0.69 | 0.00   | 0.93 |                           |                                          |                 |                                             |
| III. Medicine          | 0.86 | 0.50   | 0.99 |                           |                                          |                 |                                             |
| IV. Engineering        | 0.63 | 0.00   | 0.90 |                           |                                          |                 |                                             |
| V. Social sciences     | 0.66 | 0.00   | 0.91 |                           |                                          |                 |                                             |

\*only significant.

**Table S53.** The results of approach coping strategies for difficulties during pandemics.

| Approach coping                                       |                           |         |                     |                                    |
|-------------------------------------------------------|---------------------------|---------|---------------------|------------------------------------|
| What was the most difficult for you during pandemics? |                           |         |                     |                                    |
|                                                       | Kruskal- Wallis<br>H test | p-value | z-value             | Multiple comparisons*<br>(p-value) |
| I. Isolation                                          |                           |         |                     |                                    |
| II. Fear of infection of the loved ones               |                           |         |                     |                                    |
| III. Concern about education                          |                           |         |                     |                                    |
| IV. I was not afraid                                  |                           |         |                     | VIII vs. II<br>(0.003)             |
| V. Financial instability                              |                           |         |                     |                                    |
| VI. Fear of being infected                            |                           |         |                     | VIII vs. IX<br>(0.004)             |
| VII. Change of the lifestyle                          |                           | 0.00001 |                     |                                    |
| VIII. Loneliness                                      |                           |         | VIII vs. II<br>3.92 | IV vs. IX<br>(0.004)               |
| IX. Changes awaiting the world after the pandemics    | 43.75                     |         | VIII vs. IX<br>3.88 |                                    |
|                                                       |                           |         | IV vs. IX<br>3.84   |                                    |

\*only significant.

**Table S54.** The results of avoidant coping strategies for difficulties during pandemics.

| Avoidant coping                                       |                           |         |                      |                                    |
|-------------------------------------------------------|---------------------------|---------|----------------------|------------------------------------|
| What was the most difficult for you during pandemics? |                           |         |                      |                                    |
|                                                       | Kruskal- Wallis<br>H test | p-value | z-value              | Multiple comparisons*<br>(p-value) |
| I. Isolation                                          |                           |         |                      |                                    |
| II. Fear of infection of the loved ones               |                           |         |                      |                                    |
| III. Concern about education                          |                           |         |                      |                                    |
| IV. I was not afraid                                  |                           |         |                      | VIII vs. IV<br>(0.0001)            |
| V. Financial instability                              |                           |         |                      | VI vs. IV<br>(0.0001)              |
| VI. Fear of being infected                            |                           |         |                      |                                    |
| VII. Change of the lifestyle                          |                           | 0.00001 |                      |                                    |
| VIII. Loneliness                                      |                           |         | VIII vs. IV<br>7.29  | III vs. VIII<br>(0.0001)           |
| IX. Changes awaiting the world after the pandemics    | 79.18                     |         | VI vs. IV<br>5.91    |                                    |
|                                                       |                           |         | III vs. VIII<br>5.48 |                                    |

\*only significant.

**Table S55.** Cumulative number and percentage for DASS depression scale.

|                         | DASS depression scale |        |                   |         |                       |
|-------------------------|-----------------------|--------|-------------------|---------|-----------------------|
|                         | Class                 | Number | Cumulative number | Percent | Cumulative percentage |
| <b>Normal</b>           | 0                     | 127    | 127               | 5.85    | 5.85                  |
|                         | 1                     | 171    | 298               | 7.87    | 13.72                 |
|                         | 2                     | 236    | 534               | 10.87   | 24.59                 |
|                         | 3                     | 231    | 765               | 10.64   | 35.22                 |
|                         | 4                     | 183    | 948               | 8.43    | 43.65                 |
| <b>Mild</b>             | 5                     | 150    | 1098              | 6.91    | 50.55                 |
|                         | 6                     | 132    | 1230              | 6.08    | 56.63                 |
| <b>Moderate</b>         | 7                     | 120    | 1350              | 5.52    | 62.15                 |
|                         | 8                     | 126    | 1476              | 5.80    | 67.96                 |
|                         | 9                     | 108    | 1584              | 4.97    | 72.93                 |
|                         | 10                    | 78     | 1662              | 3.59    | 76.52                 |
| <b>Severe</b>           | 11                    | 72     | 1734              | 3.31    | 79.83                 |
|                         | 12                    | 73     | 1807              | 3.36    | 83.20                 |
|                         | 13                    | 76     | 1883              | 3.50    | 86.69                 |
| <b>Extremely severe</b> | 14                    | 65     | 1948              | 2.99    | 89.69                 |
|                         | 15                    | 59     | 2007              | 2.72    | 92.40                 |
|                         | 16                    | 43     | 2050              | 1.98    | 94.38                 |
|                         | 17                    | 24     | 2074              | 1.10    | 95.49                 |
|                         | 18                    | 30     | 2104              | 1.38    | 96.87                 |
|                         | 19                    | 21     | 2125              | 0.97    | 97.84                 |
|                         | 20                    | 29     | 2154              | 1.34    | 99.17                 |
|                         | 21                    | 18     | 2172              | 0.83    | 100.00                |
|                         |                       | 0      | 2172              | 0.00    | 100.00                |

**Table S56.** Cumulative number and percentage for DASS anxiety scale.

|                         | Class | DASS anxiety scale |                   |         |                       |
|-------------------------|-------|--------------------|-------------------|---------|-----------------------|
|                         |       | Number             | Cumulative number | Percent | Cumulative percentage |
| <b>Normal</b>           | 0     | 527                | 527               | 24.26   | 24.26                 |
|                         | 1     | 317                | 844               | 14.59   | 38.86                 |
|                         | 2     | 250                | 1094              | 11.51   | 50.37                 |
|                         | 3     | 213                | 1307              | 9.81    | 60.18                 |
| <b>Mild</b>             | 4     | 133                | 1440              | 6.12    | 66.30                 |
|                         | 5     | 140                | 1580              | 6.45    | 72.74                 |
| <b>Moderate</b>         | 6     | 108                | 1688              | 4.97    | 77.72                 |
|                         | 7     | 87                 | 1775              | 4.01    | 81.72                 |
| <b>Severe</b>           | 8     | 81                 | 1856              | 3.73    | 85.45                 |
|                         | 9     | 63                 | 1919              | 2.90    | 88.35                 |
| <b>Extremely severe</b> | 10    | 57                 | 1976              | 2.62    | 90.98                 |
|                         | 11    | 50                 | 2026              | 2.30    | 93.28                 |
|                         | 12    | 38                 | 2064              | 1.75    | 95.03                 |
|                         | 13    | 26                 | 2090              | 1.20    | 96.22                 |
|                         | 14    | 26                 | 2116              | 1.20    | 97.42                 |
|                         | 15    | 15                 | 2131              | 0.69    | 98.11                 |
|                         | 16    | 13                 | 2144              | 0.60    | 98.71                 |
|                         | 17    | 16                 | 2160              | 0.74    | 99.45                 |
|                         | 18    | 6                  | 2166              | 0.28    | 99.72                 |
|                         | 19    | 3                  | 2169              | 0.14    | 99.86                 |
|                         | 20    | 3                  | 2172              | 0.14    | 100.00                |
|                         |       | 0                  | 2172              | 0.00    | 100.00                |

**Table S57.** Cumulative number and percentage for DASS stress scale.

|                         | DASS stress scale |        |                   |         |                       |
|-------------------------|-------------------|--------|-------------------|---------|-----------------------|
|                         | Class             | Number | Cumulative number | Percent | Cumulative percentage |
| <b>Normal</b>           | 0                 | 141    | 141               | 6.49    | 6.49                  |
|                         | 1                 | 102    | 243               | 4.70    | 11.19                 |
|                         | 2                 | 116    | 359               | 5.34    | 16.53                 |
|                         | 3                 | 121    | 480               | 5.57    | 22.10                 |
|                         | 4                 | 132    | 612               | 6.08    | 28.18                 |
|                         | 5                 | 125    | 737               | 5.76    | 33.93                 |
|                         | 6                 | 147    | 884               | 6.77    | 40.70                 |
|                         | 7                 | 142    | 1026              | 6.54    | 47.24                 |
| <b>Mild</b>             | 8                 | 126    | 1152              | 5.80    | 53.04                 |
|                         | 9                 | 129    | 1281              | 5.94    | 58.98                 |
| <b>Moderate</b>         | 10                | 119    | 1400              | 5.48    | 64.46                 |
|                         | 11                | 106    | 1506              | 4.88    | 69.34                 |
|                         | 12                | 108    | 1614              | 4.97    | 74.31                 |
| <b>Severe</b>           | 13                | 107    | 1721              | 4.93    | 79.24                 |
|                         | 14                | 90     | 1811              | 4.14    | 83.38                 |
|                         | 15                | 96     | 1907              | 4.42    | 87.80                 |
|                         | 16                | 71     | 1978              | 3.27    | 91.07                 |
| <b>Extremely severe</b> | 17                | 60     | 2038              | 2.76    | 93.83                 |
|                         | 18                | 40     | 2078              | 1.84    | 95.67                 |
|                         | 19                | 39     | 2117              | 1.80    | 97.47                 |
|                         | 20                | 26     | 2143              | 1.20    | 98.66                 |
|                         | 21                | 29     | 2172              | 1.34    | 100.00                |
|                         |                   | 0      | 2172              | 0.00    | 100.00                |

**Table S58.** The results of active coping on the field of study for women.

| Women                  |      |        |       |       |       |                           |                                                              |                                             |
|------------------------|------|--------|-------|-------|-------|---------------------------|--------------------------------------------------------------|---------------------------------------------|
| Active coping          |      |        |       |       |       |                           |                                                              |                                             |
| Field of study         | Mean | Median | SD    | SE    | R     | Kruskal– Wallis<br>H test | Bonferroni correction<br><i>p</i> -value<br><i>z</i> -value* | Multiple comparisons*<br>( <i>p</i> -value) |
| I. Arts and humanities | 0.92 | 1.00   | 0.800 | 0.097 | 27.62 | 12.64                     | 0.01                                                         | 0.0132<br>III vs. V<br>2.81                 |
| II. Sciences           | 0.89 | 1.00   | 0.770 | 0.087 | 15.28 |                           |                                                              |                                             |
| III. Medicine          | 1.07 | 1.00   | 0.810 | 0.038 | 13.05 |                           |                                                              |                                             |
| IV. Engineering        | 1.08 | 1.00   | 0.790 | 0.088 | 23.67 |                           |                                                              |                                             |
| V. Social sciences     | 0.91 | 1.00   | 0.720 | 0.047 | 32.45 |                           |                                                              |                                             |

\*only significant.

**Table S59.** The results of use of informational support on the field of study for women.

| Women                        |      |        |       |       |       |                           |                                                              |                                             |
|------------------------------|------|--------|-------|-------|-------|---------------------------|--------------------------------------------------------------|---------------------------------------------|
| Use of informational support |      |        |       |       |       |                           |                                                              |                                             |
| Field of study               | Mean | Median | SD    | SE    | R     | Kruskal– Wallis<br>H test | Bonferroni correction<br><i>p</i> -value<br><i>z</i> -value* | Multiple comparisons*<br>( <i>p</i> -value) |
| I. Arts and humanities       | 1.10 | 1.00   | 1.000 | 0.116 | 87.90 | 14.86                     | 0.01                                                         | 0.0050<br>III vs. V<br>2.96                 |
| II. Sciences                 | 1.20 | 1.00   | 0.910 | 0.107 | 50.27 |                           |                                                              |                                             |
| III. Medicine                | 1.33 | 1.50   | 0.850 | 0.038 | 19.84 |                           |                                                              |                                             |
| IV. Engineering              | 1.19 | 1.00   | 0.810 | 0.087 | 50.60 |                           |                                                              |                                             |
| V. Social sciences           | 1.17 | 1.00   | 0.880 | 0.057 | 34.97 |                           |                                                              |                                             |

\*only significant.

**Table S60.** The results of planning on the field of study for women.

| Women                  |      |        |       |       |       |                           |                                                              |                                             |
|------------------------|------|--------|-------|-------|-------|---------------------------|--------------------------------------------------------------|---------------------------------------------|
| Planning               |      |        |       |       |       |                           |                                                              |                                             |
| Field of study         | Mean | Median | SD    | SE    | R     | Kruskal– Wallis<br>H test | Bonferroni correction<br><i>p</i> -value<br><i>z</i> -value* | Multiple comparisons*<br>( <i>p</i> -value) |
| I. Arts and humanities | 1.39 | 1.50   | 0.780 | 0.097 | 50.49 | 25.77                     | 0.01                                                         | 0.00001<br>III vs. V<br>4.53                |
| II. Sciences           | 1.27 | 1.50   | 0.920 | 0.106 | 93.46 |                           |                                                              |                                             |
| III. Medicine          | 1.53 | 1.50   | 0.820 | 0.038 | 28.58 |                           |                                                              |                                             |
| IV. Engineering        | 1.45 | 1.50   | 0.820 | 0.087 | 86.38 |                           |                                                              |                                             |
| V. Social sciences     | 1.29 | 1.00   | 0.850 | 0.056 | 98.47 |                           |                                                              |                                             |

\*only significant.

**Table S61.** The results of humor on the field of study for women.

| Women                  |      |        |      |       |       |                           |                                          |                  |                                             |
|------------------------|------|--------|------|-------|-------|---------------------------|------------------------------------------|------------------|---------------------------------------------|
| Humor                  |      |        |      |       |       |                           |                                          |                  |                                             |
| Field of study         | Mean | Median | SD   | SE    | R     | Kruskal– Wallis<br>H test | Bonferroni correction<br><i>p</i> -value | <i>z</i> -value* | Multiple comparisons*<br>( <i>p</i> -value) |
| I. Arts and humanities | 0.94 | 1.00   | 0.65 | 0.077 | 59.25 | 13.67                     | 0.01                                     | 0.0084           | III vs. V<br>3.41                           |
| II. Sciences           | 1.04 | 1.00   | 0.62 | 0.078 | 15.13 |                           |                                          |                  |                                             |
| III. Medicine          | 1.04 | 1.00   | 0.69 | 0.028 | 09.41 |                           |                                          |                  |                                             |
| IV. Engineering        | 1.05 | 1.00   | 0.66 | 0.078 | 22.12 |                           |                                          |                  |                                             |
| V. Social sciences     | 0.88 | 1.00   | 0.64 | 0.037 | 11.43 |                           |                                          |                  |                                             |

\*only significant.

**Table S62.** The results of acceptance on the field of study for women.

| Women                  |      |        |      |       |       |                           |                                          |                  |                                             |
|------------------------|------|--------|------|-------|-------|---------------------------|------------------------------------------|------------------|---------------------------------------------|
| Acceptance             |      |        |      |       |       |                           |                                          |                  |                                             |
| Field of study         | Mean | Median | SD   | SE    | R     | Kruskal– Wallis<br>H test | Bonferroni correction<br><i>p</i> -value | <i>z</i> -value* | Multiple comparisons*<br>( <i>p</i> -value) |
| I. Arts and humanities | 2.10 | 2.00   | 0.77 | 0.097 | 48.59 | 30.82                     | 0.01                                     | 0.00001          | II vs. III<br>2.92<br>III vs. V<br>4.84     |
| II. Sciences           | 1.97 | 2.00   | 0.84 | 0.096 | 81.31 |                           |                                          |                  |                                             |
| III. Medicine          | 2.26 | 2.50   | 0.67 | 0.028 | 32.89 |                           |                                          |                  |                                             |
| IV. Engineering        | 2.17 | 2.00   | 0.69 | 0.077 | 70.78 |                           |                                          |                  |                                             |
| V. Social sciences     | 2.03 | 2.00   | 0.75 | 0.046 | 94.02 |                           |                                          |                  |                                             |

\*only significant.



**Table S63.** The results of religion on the field of study for women.

| <b>Women</b>                  |      |        |      |      |        |                           |                                          |                  |                                             |
|-------------------------------|------|--------|------|------|--------|---------------------------|------------------------------------------|------------------|---------------------------------------------|
| <b>Religion</b>               |      |        |      |      |        |                           |                                          |                  |                                             |
| Field of study                | Mean | Median | SD   | SE   | R      | Kruskal– Wallis<br>H test | Bonferroni correction<br><i>p</i> -value | <i>z</i> -value* | Multiple comparisons*<br>( <i>p</i> -value) |
| <b>I. Arts and humanities</b> | 0.82 | 0.50   | 1.01 | 0.11 | 785.66 | 22.49                     | 0.01                                     | 0.0002           | III vs. V<br>0.0006                         |
| <b>II. Sciences</b>           | 0.65 | 0.00   | 0.91 | 0.10 | 702.99 |                           |                                          |                  |                                             |
| <b>III. Medicine</b>          | 0.92 | 0.50   | 1.02 | 0.03 | 824.87 |                           |                                          |                  |                                             |
| <b>IV. Engineering</b>        | 0.75 | 0.00   | 0.97 | 0.10 | 747.03 |                           |                                          |                  |                                             |
| <b>V. Social sciences</b>     | 0.67 | 0.00   | 0.91 | 0.05 | 710.18 |                           |                                          |                  |                                             |

\*only significant.

**Table S64.** The results of self-blame on the field of study for women.

| <b>Women</b>                  |      |        |      |      |        |                           |                                          |                  |                                             |
|-------------------------------|------|--------|------|------|--------|---------------------------|------------------------------------------|------------------|---------------------------------------------|
| <b>Self-blame</b>             |      |        |      |      |        |                           |                                          |                  |                                             |
| Field of study                | Mean | Median | SD   | SE   | R      | Kruskal– Wallis<br>H test | Bonferroni correction<br><i>p</i> -value | <i>z</i> -value* | Multiple comparisons*<br>( <i>p</i> -value) |
| <b>I. Arts and humanities</b> | 0.75 | 0.50   | 0.72 | 0.08 | 774.27 | 12.95                     | 0.01                                     | 0.01             | III vs. V<br>2.90                           |
| <b>II. Sciences</b>           | 0.89 | 0.50   | 0.71 | 0.08 | 872.71 |                           |                                          |                  |                                             |
| <b>III. Medicine</b>          | 0.78 | 0.50   | 0.69 | 0.02 | 806.75 |                           |                                          |                  |                                             |
| <b>IV. Engineering</b>        | 0.70 | 0.50   | 0.70 | 0.07 | 746.67 |                           |                                          |                  |                                             |
| <b>V. Social sciences</b>     | 0.67 | 0.50   | 0.68 | 0.04 | 723.57 |                           |                                          |                  |                                             |

\*only significant.

**Table S65.** The results of active coping on the field of study for men.

| <b>Men</b>                    |      |        |      |      |        |                           |                                          |                  |                                             |
|-------------------------------|------|--------|------|------|--------|---------------------------|------------------------------------------|------------------|---------------------------------------------|
| <b>Active coping</b>          |      |        |      |      |        |                           |                                          |                  |                                             |
| Field of study                | Mean | Median | SD   | SE   | R      | Kruskal– Wallis<br>H test | Bonferroni correction<br><i>p</i> -value | <i>z</i> -value* | Multiple comparisons*<br>( <i>p</i> -value) |
| <b>I. Arts and humanities</b> | 0.92 | 0.50   | 0.86 | 0.15 | 278.10 | 9.60                      | 0.01                                     | 0.0477           | IV vs. V<br>0.04                            |
| <b>II. Sciences</b>           | 0.81 | 0.50   | 0.90 | 0.25 | 257.46 |                           |                                          |                  |                                             |
| <b>III. Medicine</b>          | 0.99 | 1.00   | 0.83 | 0.04 | 296.27 |                           |                                          |                  |                                             |
| <b>IV. Engineering</b>        | 0.80 | 1.00   | 0.73 | 0.07 | 260.18 |                           |                                          |                  |                                             |
| <b>V. Social sciences</b>     | 1.13 | 1.00   | 0.77 | 0.09 | 329.47 |                           |                                          |                  |                                             |

\*only significant.
